# Supplementary material
Source: publisher figshare collection journal article supplement (https://acs.figshare.com/ndownloader/files/22388487)
Supplement: Supplementary file 1 [file 22388487]

Supporting Information

The number of pages: 11

The number of figures: 8

The number of Tables: 0

## **Light-driven hydrogenation of bicarbonate into formate over nano Pd/TiO<sub>2</sub>**

Binbin Jin,<sup>a</sup> Xin Ye,<sup>a</sup> Heng Zhong<sup>\*,a,b,c</sup> and Fangming Jin<sup>\*,a,b,c</sup>

<sup>a</sup> School of Environmental Science and Engineering, State Key Lab of Metal Matrix Composites, Shanghai Jiao Tong University, 800 Dongchuan Road, Shanghai 200240, China.

<sup>b</sup> Center of Hydrogen Science, Shanghai Jiao Tong University, 800 Dongchuan Road, Shanghai 200240, China

<sup>c</sup> Shanghai Institute of Pollution Control and Ecological Security, Shanghai 200092, China

\* Corresponding author E-mail address: fmjin@sjtu.edu.cn (Fangming Jin); zhong.h@sjtu.edu.cn (Heng Zhong)

### Calculation of the photothermal conversion efficiency

The photothermal conversion efficiency of 5 wt% Pd/TiO<sub>2</sub> NPs was calculated according to previous reports.<sup>1-3</sup> The testing device we conducted is displayed in **Figure S8** and the details of calculation were displayed as follows:

First, all the calculation is based on total energy balance of the irradiation system as follows:

$$\sum_i m_i C_{p,i} \frac{dT}{dt} = Q_{NPs} + Q_s - Q_{loss} \dots\dots\dots (1)$$

where  $m$  and  $C_p$  are the mass (kg) and heat capacity (J/kg/°C), respectively. The suffix “i” refers to water or catalyst NPs.  $T$  is the solution temperature.  $Q_{NPs}$  is the heat energy generated by 5 wt% Pd/TiO<sub>2</sub> NPs per second:

$$Q_{NPs} = I \times \eta \dots\dots\dots (2)$$

where  $I$  is the energy NPs absorbed and  $\eta$  is the photothermal conversion efficiency of wt% Pd/TiO<sub>2</sub> NPs.

$Q_{loss}$  is thermal energy lost to the surroundings

$$Q_{loss} = hA\Delta T \dots\dots\dots (3)$$

Where  $h$  is the heat transfer coefficient,  $A$  is the surface area of the container, and  $\Delta T$  is the temperature change, which is referred to  $T - T_{surrounding}$  ( $T$  and  $T_{surrounding}$  are the solution temperature and ambient temperature of the surrounding, respectively).

$Q_s$  is the heat generated by solvent per second. In the case of pure water, the heat input is equal to the heat output at the maximum steady-state temperature, so the equation (3) can be expressed by equation (4):

$$Q_s = Q_{loss} = hA\Delta T_{max,H_2O} \dots\dots\dots (4)$$

Where  $\Delta T_{max,H_2O}$  is the temperature change of water at the maximum steady-state temperature. As it to the experiment of 5 wt% Pd/TiO<sub>2</sub> NPs dispersion, the heat inputs are the heat generated by nanoparticles ( $Q_{NPs}$ ) and water ( $Q_s$ ), which is equal to the heat output at the maximum steady-state temperature, so the equation can be expressed as following:

$$Q_{NPs} + Q_s = Q_{loss} = hA\Delta T_{max,mix} \dots\dots\dots (5)$$

Where  $\Delta T_{max,mix}$  is the temperature change of the 5 wt% Pd/TiO<sub>2</sub> NPs dispersion at the maximum steady-state temperature. According to the equation (2), (4) and (5),  $\eta$  can be calculated as follows:

$$\eta = \frac{hA(\Delta T_{max,mix} - \Delta T_{max,H_2O})}{I} \dots\dots\dots (6)$$

In this equation, only  $hA$  is unknown for calculation. To get the  $hA$ , we introduce  $\theta$

here:

$$\theta = \frac{\Delta T}{\Delta T_{max}} \dots\dots\dots (7)$$

Substituting equation (7) into equation (1):

$$\frac{d\theta}{dt} = \frac{hA}{\sum_i m_i C_{p,i}} \left[ \frac{Q_{NPs} + Q_s}{hA\Delta T_{max}} - \theta \right] \dots\dots\dots (8)$$

When the light source was turned off, the  $Q_{NPs} + Q_s = 0$ , equation (8) could be expressed as following:

$$dt = - \frac{\sum_i m_i C_{p,i} d\theta}{hA \theta} \dots\dots\dots (9)$$

Equation (8) could be expressed as follows after further integration:

$$t = - \frac{\sum_i m_i C_{p,i}}{hA} \ln \theta \dots\dots\dots (10)$$

Where  $\frac{\sum_i m_i C_{p,i}}{hA}$  can be calculated by linear relationship of time versus  $-\ln\theta$ . Considering that the mass of NPs is too little compared with that of solvent and the specific heat of water is much higher than other materials, the  $m_{NPs}$  and  $C_{p,NPs}$  were neglected.  $m_{H_2O}$  was  $3 \times 10^{-3}$  Kg and  $C_{p,H_2O}$  was  $4.2 \times 10^3$  J/kg/°C. So we can get  $hA$  equals 0.0233.

Subsequently, we substituted every known value into equation (6) to get  $\eta$ .  $\Delta T_{max,mix}$  was 51.5 °C .  $\Delta T_{max,H_2O}$  is 30.3 °C . The total energy input of the irradiation was 2.718 W where the irradiation area was 3 cm<sup>2</sup> and the intensity of the light as 906 mW/cm<sup>2</sup>. The light intensity decrease to 532 mW/cm<sup>2</sup> after the absorption of solvent, indicating that the energy NPs absorbed ( $I$ ) is 1.596 W. Thus, the photothermal conversion efficiency ( $\eta$ ) of 5 wt% Pd/TiO<sub>2</sub> could be 30.9%.

## References

- (1) Roper, D.K.; Ahn, W.; Hoepfner, M. Microscale heat transfer transduced by surface plasmon resonant gold nanoparticles. *J. Phys. Chem. C* **2007**, *11*, 3636-3641.
- (2) Liu, Y.; Ai, K.; Liu, J.; Deng, M.; He, Y.; Lu, L. Dopamine - melanin colloidal nanospheres: an efficient near - infrared photothermal therapeutic agent for in vivo cancer therapy. *Adv. Mater.* **2013**, *25*, 1353-1359.
- (3) Zou, Q.; Abbas, M.; Zhao, L.; Li, S.; Shen, G.; Yan, X. Biological photothermal nanodots based on self-assembly of peptide-porphyrin conjugates for antitumor therapy. *J. Am. Chem. Soc.*, **2017**, *139*, 1921-1927.

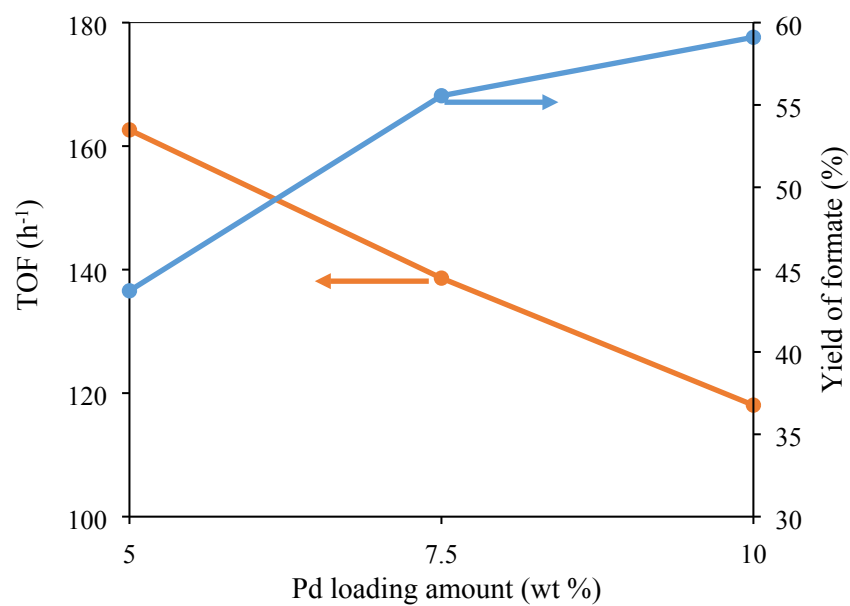

**Figure S1.** Effect of Pd loading in Pd/TiO<sub>2</sub> on the hydrogenation of KHCO<sub>3</sub> under irradiation (reaction conditions: 3 MPa H<sub>2</sub>, 5 mL distilled H<sub>2</sub>O, 10 mmol KHCO<sub>3</sub>, 20 mg catalyst, 3 h).

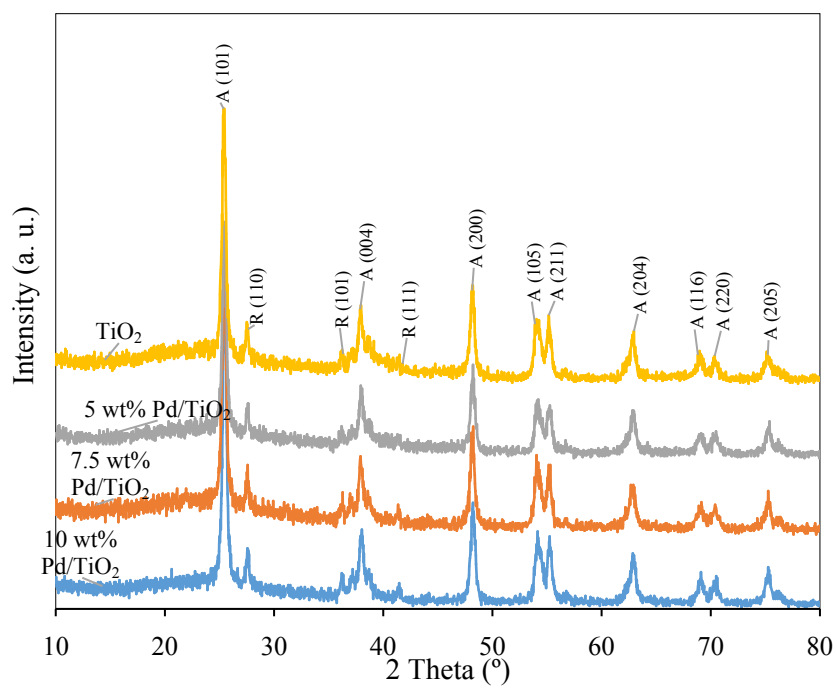

**Figure S2.** XRD patterns of  $\text{TiO}_2$ , 5 wt%  $\text{Pd/TiO}_2$ , 7.5 wt%  $\text{Pd/TiO}_2$  and 10 wt%  $\text{Pd/TiO}_2$  (A represents anatase, R represents rutile).

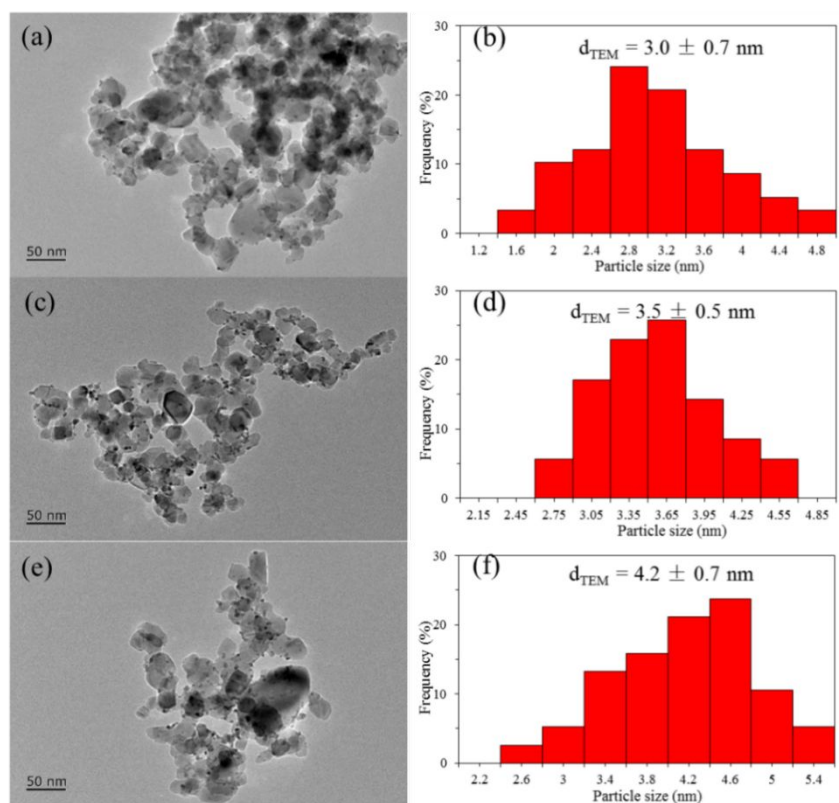

**Figure S3.** TEM images and Pd NPs size distribution of 5 wt% Pd/TiO<sub>2</sub> (a and b), 7.5 wt% Pd/TiO<sub>2</sub> (c and d), and 10 wt% Pd/TiO<sub>2</sub> (e and f).

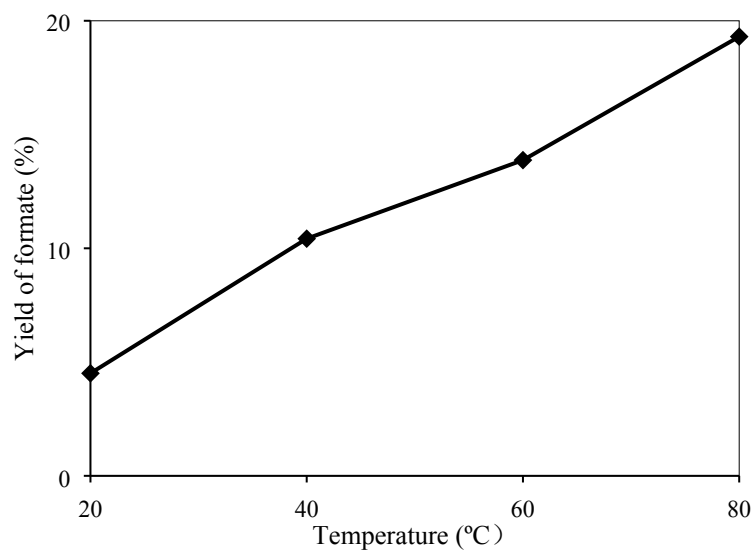

**Figure S4.** Effect of temperature on the hydrogenation of  $\text{KHCO}_3$  without irradiation (reaction conditions: 3 MPa  $\text{H}_2$ , 5 mL distilled  $\text{H}_2\text{O}$ , 10 mmol  $\text{KHCO}_3$ , 20 mg 5 wt%  $\text{Pd/TiO}_2$ , 3 h).

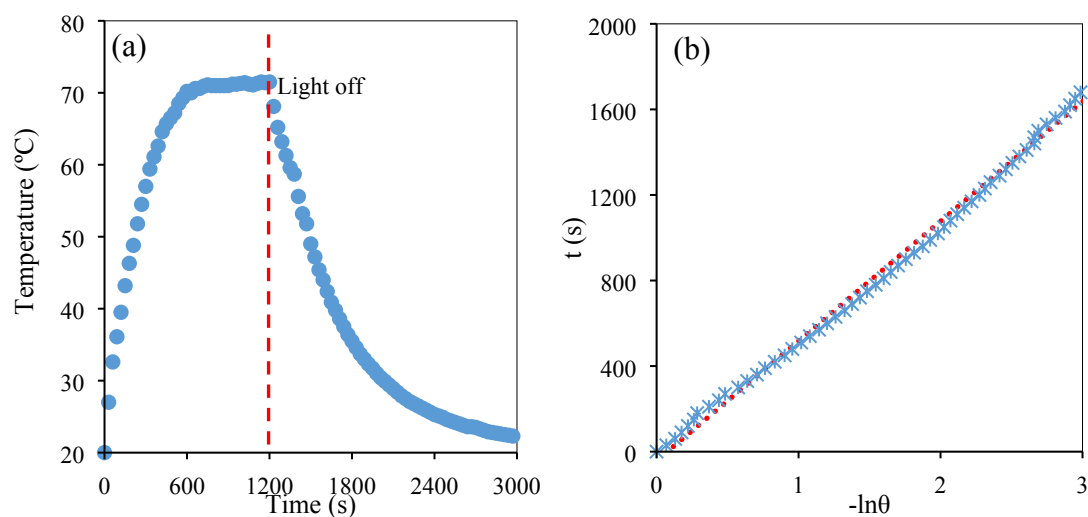

**Figure S5.** (a) The temperature curve of the 5 wt% Pd/TiO<sub>2</sub> aqueous solution (200  $\mu\text{g/mL}$ ) for 1200 s with irradiation and then the light was shut off; (b) Linear time data versus  $-\ln\theta$  obtained from the cooling period of 5 wt% Pd/TiO<sub>2</sub> aqueous solution.



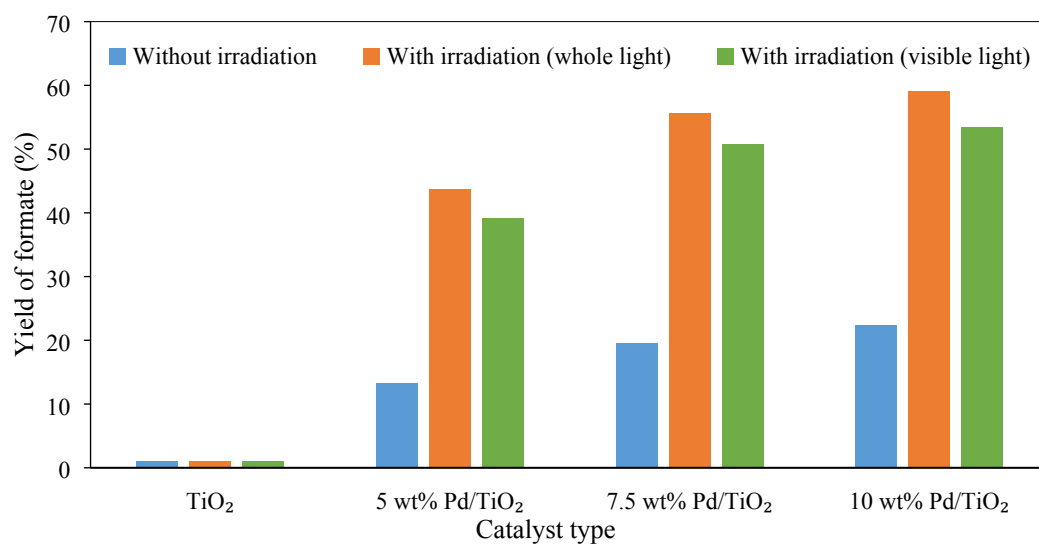

**Figure S6.** Formate yield obtained over different catalysts (reaction conditions: 3 MPa H<sub>2</sub>, 2 mol/L KHCO<sub>3</sub>, 20 mg catalyst, 3 h)

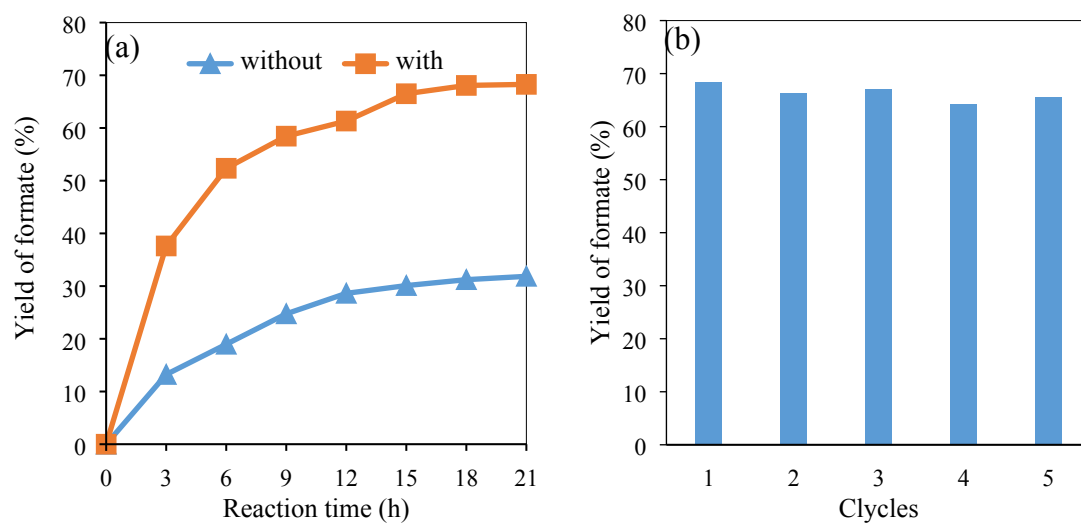

**Figure S7.** (a) Effect of reaction time on the hydrogenation of KHCO<sub>3</sub> with/without irradiation (reaction conditions: 3 MPa H<sub>2</sub>, 5 mL distilled H<sub>2</sub>O, 10 mmol KHCO<sub>3</sub>, 20 mg 5 wt% Pd/TiO<sub>2</sub> catalyst). (b) Catalyst recycle in hydrogenation of KHCO<sub>3</sub> (reaction conditions: 3 MPa H<sub>2</sub>, 5 mL distilled H<sub>2</sub>O, 10 mmol KHCO<sub>3</sub>, 20 mg 5 wt% Pd/TiO<sub>2</sub> catalyst, 21 h).

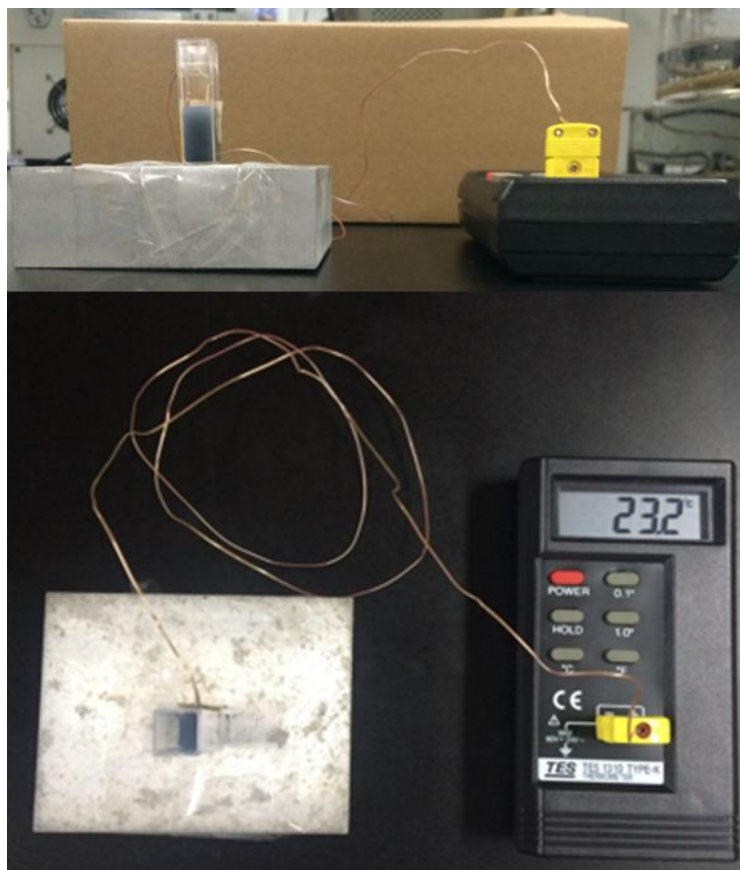

**Figure S8.** Camera photo of the testing device for photothermal conversion efficiency calculation
